# Supplementary material for: Thrombospondin 1 enhances systemic inflammation and disease severity in acute-on-chronic liver failure
Source: Springer Nature journal article supplement (doi:10.1186/s12916-024-03318-x), 2024-03-05
Supplement: MOESM1 [file 26820178]

## **ADDITIONAL FILE 1**

### **Thrombospondin 1 enhances systemic inflammation and disease severity in acute-on-chronic liver failure**

Hozeifa Mohamed Hassan<sup>†</sup>, Xi Liang<sup>†</sup>, Jiaojiao Xin<sup>†</sup>, Yingyan Lu, Qun Cai, Dongyan Shi, Keke Ren, Jun Li, Qi Chen, Jiang Li, Peng Li, Beibei Guo, Hui Yang, Jinjin Luo, Heng Yao, Xingping Zhou, Wen Hu, Jing Jiang<sup>\*</sup>, Jun Li<sup>\*</sup>

#### **Contents**

- **Table S1**
- **Table S2**
- **Table S3**
- **Table S4**
- **Table S5**
- **Table S6**
- **Table S7**
- **Table S8**
- **Table S9**

**Table S1. Clinical characteristics of all enrolled subjects**

| Characteristics                             | ACLF (n=130)         | LC (n=70)                 | CHB (n=70)                | NC (n=60)                |
|---------------------------------------------|----------------------|---------------------------|---------------------------|--------------------------|
| Age (yrs.)                                  | 44.5 [36.2, 55.0]    | 46.0 [40.0, 52.5]         | 43.5 [38.0, 50.0]         | 46.5 [33.8, 53.0]        |
| Male (%)                                    | 86.2% (112)          | 74.3% (52)                | 77.1% (54)                | 56.7% (34) ***           |
| <b>HBV DNA level (IU/mL)</b>                |                      | Significance <sup>†</sup> | Significance <sup>†</sup> |                          |
| ≤ 2×10 <sup>2</sup>                         | 5.4% (7)             | 91.4% (64)                | 81.4% (57)                | NA                       |
| 2×10 <sup>2</sup> – 2×10 <sup>6</sup>       | 66.9% (87)           | 8.6% (6)                  | 12.9% (9)                 | NA                       |
| > 2×10 <sup>6</sup>                         | 27.7% (36)           | 0.0% (0)                  | 5.7% (4)                  | NA                       |
| <b>Laboratory data</b>                      |                      |                           |                           |                          |
| Alanine aminotransferase (U/L)              | 252.0 [93.0, 592.0]  | 24.5 [18.0, 32.0] ***     | 23.2 [17.0, 29.8] ***     | 19.0 [14.0, 25.0] ***    |
| Aspartate aminotransferase (U/L)            | 147.5 [101.3, 290.8] | 23.5 [19.3, 29.8] ***     | 22.0 [20.0, 26.8] ***     | 20.0 [18.0, 25.0] ***    |
| Albumin (g/dL)                              | 31.5 [28.5, 33.8]    | 47.6 [45.6, 48.8] ***     | 48.7 [46.5, 51.1] ***     | 47.7 [46.1, 49.1] ***    |
| Total bilirubin (μmol/L)                    | 352.5 [262.9, 437.9] | 13.2 [11.0, 17.0] ***     | 13.0 [9.2, 16.0] ***      | 11.0 [8.5, 14.0] ***     |
| Alkaline phosphatase (U/L)                  | 137.0 [110.5, 166.0] | 70.0 [58.3, 90.0] ***     | 64.5 [50.5, 79.8] ***     | 67.00 [55.0, 84.0] ***   |
| γ-Glutamyl transpeptidase (U/L)             | 77.8 [56.0, 115.4]   | 22.0 [17.0, 37.8] ***     | 20.5 [13.0, 32.8] ***     | 19.0 [12.8, 27.0] ***    |
| Creatinine (μmol/L)                         | 67.0 [58.0, 80.8]    | 70.5 [62.7, 81.0]         | 75.0 [65.0, 85.0]         | 70.5 [57.7, 81.0]        |
| Sodium (mmol/L)                             | 137.0 [135.0, 139.0] | 141.0 [140.0, 142.0] ***  | 141.0 [140.0, 143.0] ***  | 141.0 [140.0, 143.0] *** |
| White blood cell count (10 <sup>9</sup> /L) | 7.6 [6.1, 10.3]      | 5.1 [4.0, 6.3] ***        | 5.5 [4.7, 6.3] ***        | 6.1 [5.4, 6.9] ***       |

| Characteristics                     | ACLF (n=130)         | LC (n=70)                | CHB (n=70)               | NC (n=60)                |
|-------------------------------------|----------------------|--------------------------|--------------------------|--------------------------|
| Hemoglobin (g/L)                    | 125.0 [116.2, 136.0] | 153.0 [142.5, 158.8] *** | 151.0 [140.0, 162.0] *** | 149.0 [136.8, 160.0] *** |
| Hematocrit (%)                      | 35.6 [32.5, 38.9]    | 45.5 [42.9, 47.3] ***    | 44.5 [41.2, 46.9] ***    | 44.1 [40.7, 47.6] ***    |
| Platelet count (10 <sup>9</sup> /L) | 112.0 [74.0, 145.0]  | 155.5 [117.0, 207.8] *** | 178.9 ± 63.3 ***         | 218.5 [188.5, 257.2] *** |
| INR                                 | 2.3 [1.8, 3.0]       | 1.0 [1.0, 1.1] ***       | 0.97 [0.94, 1.02] ***    | NA                       |
| Alpha fetoprotein                   | 88.8 [34.8, 235.3]   | 2.2 [1.8, 2.8] ***       | 2.5 [1.9, 3.4] ***       | 2.8 [2.0, 4.0] ***       |
| <b>Organ failure (%)</b>            |                      |                          |                          |                          |
| Liver                               | 94.6% (123)          | NA                       | NA                       | NA                       |
| Coagulation                         | 42.3% (55)           | NA                       | NA                       | NA                       |
| Kidneys                             | 6.2% (8)             | NA                       | NA                       | NA                       |
| Brain                               | 7.7% (10)            | NA                       | NA                       | NA                       |
| Lungs                               | 1.5% (2)             | NA                       | NA                       | NA                       |
| Circulation                         | 0.8% (1)             | NA                       | NA                       | NA                       |
| <b>Severity score</b>               |                      |                          |                          |                          |
| COSSH-ACLF IIs                      | 7.3 [6.7, 7.8]       | NA                       | NA                       | NA                       |
| COSSH-ACLFs                         | 6.2 [5.7, 6.8]       | NA                       | NA                       | NA                       |

| Characteristics                                                       | ACLF (n=130)      | LC (n=70)      | CHB (n=70)     | NC (n=60) |
|-----------------------------------------------------------------------|-------------------|----------------|----------------|-----------|
| CLIF-C ACLFs                                                          | 42.0 [37.3, 47.1] | NA             | NA             | NA        |
| MELDs                                                                 | 24.6 [20.5, 28.3] | NA             | NA             | NA        |
| MELD-Nas                                                              | 25.7 [22.0, 29.5] | NA             | NA             | NA        |
| CTP                                                                   | 10.0 [9.0, 11.0]  | 5.0 [5.0, 5.0] | 5.0 [5.0, 5.0] | NA        |
| <b>Transplant-free mortality rate (number of deceased patients) ‡</b> |                   |                |                |           |
| 28-day                                                                | 33.0% (37)        | NA             | NA             | NA        |
| 90-day                                                                | 46.0% (47)        | NA             | NA             | NA        |

NOTE. Data are presented as the means  $\pm$  SDs, medians with [p25, p75], or percentages (numbers of patients). ACLF, acute-on-chronic liver failure; LC, liver cirrhosis; CHB, chronic hepatitis B; NC, normal control; COSSH-ACLFs, COSSH-ACLF score; CLIF-C ACLFs, CLIF Consortium ACLF score; MELDs, Model for End-stage Liver Disease score; MELD-Nas, MELD-sodium score; CTP, Child-Turcotte-Pugh score.

‡Twelve patients with ACLF underwent liver transplantation and were considered lost to follow-up in the mortality rate calculation. Six patients with ACLF were lost to the 28-day follow-up analysis, and 16 patients were lost to the 90-day follow-up analysis.

† *P* value (<0.001) for comparisons of the HBV DNA distribution between the LC/CHB/NC and ACLF groups.

\*\*\* *P*<0.001 for comparisons between the LC/CHB/NC and ACLF groups.

**Table S2. Clinical characteristics of ACLF patients in the ELISA validation group**

| <b>Characteristics</b>                | <b>All HBV-ACLF<br/>(n = 198)</b> | <b>Non-Survivor<sup>†</sup><br/>(n = 91)</b> | <b>Survivor<sup>†</sup><br/>(n = 107)</b> |
|---------------------------------------|-----------------------------------|----------------------------------------------|-------------------------------------------|
| Age (yrs.)                            | 48.3±11.9                         | 52.7±11.3                                    | 44.6±11.2                                 |
| Male (%)                              | 81.3% (161)                       | 80.2% (73)                                   | 82.2% (88)                                |
| <b>HBV DNA level (IU/mL)</b>          |                                   |                                              |                                           |
| ≤ 2×10 <sup>2</sup>                   | 5.6% (11)                         | 4.4% (4)                                     | 8.4% (9)                                  |
| 2×10 <sup>2</sup> – 2×10 <sup>6</sup> | 65.6% (130)                       | 62.6% (57)                                   | 66.4% (71)                                |
| > 2×10 <sup>6</sup>                   | 28.8% (57)                        | 33.0% (30)                                   | 25.2% (27)                                |
| <b>Laboratory data</b>                |                                   |                                              |                                           |
| Alanine aminotransferase (U/L)        | 224.0 [90.0, 443.0]               | 218.0 [91.0, 476.0]                          | 244.0 [82.0, 435.0]                       |
| Aspartate aminotransferase (U/L)      | 130.5 [78.8, 277.5]               | 147.0 [86.0, 323.0]                          | 130.0 [75.0, 216.0]                       |
| Albumin (g/dL)                        | 30.7 [28.2, 33.0]                 | 30.0 [27.7, 32.6]                            | 31.1 [28.6, 34.1] *                       |
| Total bilirubin (μmol/L)              | 343.6 [277.7, 427.6]              | 398.4 [307.5, 452.3]                         | 306.4 [253.5, 378.0] ***                  |
| Alkaline phosphatase (U/L)            | 143.5 [120.0, 176.3]              | 142.0 [118.0, 179.0]                         | 146.0 [121.0, 176.0]                      |
| γ-Glutamyl transpeptidase (U/L)       | 76.0 [49.0, 120.5]                | 68.0 [48.0, 114.0]                           | 77.0 [50.0, 123.0]                        |
| Creatinine (μmol/L)                   | 61.5 [54.0, 76.3]                 | 63.0 [54.0, 85.0]                            | 60.0 [53.0, 71.0] **                      |

| <b>Characteristics</b>                      | <b>All HBV-ACLF<br/>(n = 198)</b> | <b>Non-Survivor<sup>†</sup><br/>(n = 91)</b> | <b>Survivor<sup>†</sup><br/>(n = 107)</b> |
|---------------------------------------------|-----------------------------------|----------------------------------------------|-------------------------------------------|
| Serum urea (mmol/L)                         | 4.3 [3.2, 6.2]                    | 5.1 [3.6, 7.6]                               | 3.9 [2.9, 5.2] ***                        |
| Triglycerides (mmol/L)                      | 1.2 [0.9, 1.5]                    | 1.0 [0.8, 1.3]                               | 1.3 [1.0, 1.8] ***                        |
| Total cholesterol (mmol/L)                  | 2.0 [1.6, 2.6]                    | 1.8 [1.5, 2.3]                               | 2.2 [1.8, 2.7] **                         |
| Sodium (mmol/L)                             | 138.0 [136.0, 140.0]              | 137.0 [135.0, 139.0]                         | 138.0 [136.0, 140.0]                      |
| White blood cell count (10 <sup>9</sup> /L) | 7.5 [5.9, 9.6]                    | 7.8 [6.3, 10.3]                              | 6.9 [5.0, 9.4] **                         |
| Neutrophils (10 <sup>9</sup> /L)            | 5.3 [3.6, 7.1]                    | 5.7 [4.3, 8.2]                               | 4.5 [3.1, 6.8] ***                        |
| Hemoglobin (g/L)                            | 122.0 [107.0, 137.0]              | 121.0 [107.0, 136.0]                         | 123.0 [108, 138.0]                        |
| Hematocrit (%)                              | 33.8 [29.9, 39.1]                 | 33.2 [29.7, 38.1]                            | 34.1 [30.5, 39.5]                         |
| Platelet count (10 <sup>9</sup> /L)         | 100.5 [69.0, 136.3]               | 91.0 [69.0, 124.0]                           | 110.0 [70.0, 149] *                       |
| INR                                         | 2.1 [1.8, 2.7]                    | 2.5 [2.0, 3.2]                               | 1.9 [1.6, 2.3] ***                        |
| Fibrinogen (g/L)                            | 1.3 [1.0, 1.6]                    | 1.2 [0.9, 1.5]                               | 1.4 [1.1, 1.7] **                         |
| Prothrombin time (s)                        | 23.6 [19.9, 29.1]                 | 28.7 [22.7, 34.0]                            | 21.0 [18.6, 25.2] ***                     |
| D-dimer (μg/L)                              | 2315.0 [1098.0, 4228.0]           | 3496.0 [1840.0, 5031.0]                      | 1742.0 [751.0, 3290.0] ***                |
| Alpha fetoprotein                           | 93.5 [30.0, 261.3]                | 88.6 [23.8, 222.7]                           | 116.7 [30.1, 294.6]                       |
| Ferritin (μg/L)                             | 2664.0 [1689.0, 4789.0]           | 3333.0 [2050.0, 5922.0]                      | 2347.0 [1286.0, 4024.0] **                |

| <b>Characteristics</b>   | <b>All HBV-ACLF<br/>(n = 198)</b> | <b>Non-Survivor<sup>†</sup><br/>(n = 91)</b> | <b>Survivor<sup>†</sup><br/>(n = 107)</b> |
|--------------------------|-----------------------------------|----------------------------------------------|-------------------------------------------|
| <b>Organ failure (%)</b> |                                   |                                              |                                           |
| Liver                    | 98.5% (195)                       | 97.8% (89)                                   | 99.1% (106)                               |
| Coagulation              | 34.9% (69)                        | 55.0% (50)                                   | 17.8% (19) ***                            |
| Kidneys                  | 4.0% (8)                          | 8.8% (8)                                     | 0.0% (0) ***                              |
| Brain                    | 9.6% (19)                         | 17.6% (16)                                   | 2.8% (3) ***                              |
| Lungs                    | 1.5% (3)                          | 3.3% (3)                                     | 0.0% (0)                                  |
| Circulation              | 3.0% (6)                          | 5.5% (5)                                     | 0.9% (1)                                  |
| <b>Severity score</b>    |                                   |                                              |                                           |
| COSSH-ACLFs              | 6.2 [5.7, 6.9]                    | 6.8 [6.3, 7.6]                               | 5.8 [5.4, 6.2] ***                        |
| COSSH-ACLF IIs           | 7.2 [6.6, 8.0]                    | 8.0 [7.3, 8.5]                               | 6.7 [6.3, 7.1] ***                        |
| CLIF-C ACLFs             | 42.5 [37.4, 48.2]                 | 47.7 [43.1, 51.3]                            | 38.7 [34.3, 42.4] ***                     |
| MELDs                    | 26.6 [24.3, 29.3]                 | 29.0 [26.6, 32.7]                            | 25.0 [23.2, 27.0] ***                     |
| MELD-Nas                 | 27.2 [25.2, 30.1]                 | 29.6 [27.1, 32.9]                            | 25.8 [23.9, 27.3] ***                     |
| CTP                      | 11.0 [10.0, 12.0]                 | 12.0 [11.0, 12.0]                            | 11.0 [10.0, 11.0] ***                     |

| Characteristics                                                     | All HBV-ACLF<br>(n = 198) | Non-Survivor <sup>†</sup><br>(n = 91) | Survivor <sup>†</sup><br>(n = 107) |
|---------------------------------------------------------------------|---------------------------|---------------------------------------|------------------------------------|
| <b>ACLF grade</b>                                                   |                           |                                       |                                    |
| ACLF-1                                                              | 62.6% (124)               | 40.7% (37)                            | 81.3% (87) **                      |
| ACLF-2                                                              | 28.3% (56)                | 40.7% (37)                            | 17.8% (19) **                      |
| ACLF-3                                                              | 9.1% (18)                 | 18.6% (17)                            | 0.9% (1) ***                       |
| <b>Transplant-free mortality rate (number of deceased patients)</b> |                           |                                       |                                    |
| 28-day                                                              | 33.3% (66)                | 72.5% (66)                            | 0.0% (0) ***                       |
| 90-day                                                              | 46.0% (91)                | 100.0% (91)                           | 0.0% (0) ***                       |

NOTE. Data are presented as the means ± SDs, medians with [p25, p75], or percentages (numbers of patients). ACLF, acute-on-chronic liver failure; COSSH-ACLFs, Chinese Group on the Study of Severe Hepatitis B-ACLF score; COSSH-ACLF IIs, COSSH-ACLF II score; CLIF-C ACLFs, Chronic Liver Failure- Consortium ACLF score; MELDs, model for end-stage liver disease score; MELD-Nas, MELD-sodium score; CTP, child-turcotte-pugh score.

<sup>†</sup> Non-survivor, HBV-ACLF patients who died within 90 days; Survivor, HBV-ACLF patients who survived 90 days.

\**P* value (<0.05), \*\**P* value (<0.01) and \*\*\**P* value (<0.001) for comparisons between non-survivor and survivor group.



**Table S3. Primers used for real-time PCR**

| <b>Gene</b>                    | <b>Primer orientation</b> | <b>Nucleotide sequence</b>      | <b>NCBI Gene ID number</b> |
|--------------------------------|---------------------------|---------------------------------|----------------------------|
| <i>hGAPDH</i>                  | forward                   | 5'-CTCTCTGCTCCTCCTGTTCG-3'      | 2597                       |
|                                | reverse                   | 5'-ACGACCAAATCCGTTGACTC-3'      |                            |
| <i>hTHBS1</i>                  | forward                   | 5'-AGGCATGTTCCAGTTTCACC-3'      | 7057                       |
|                                | reverse                   | 5'-GCTGGCACCACCTTTATTGT-3'      |                            |
| <i>rGAPDH</i>                  | forward                   | 5'-ATGGAGAAGGCTGGGGCTCACCT-3'   | 24383                      |
|                                | reverse                   | 5'-AGCCCTTCCACGATGCCAAAGTTGT-3' |                            |
| <i>rTHBS1</i>                  | forward                   | 5'-TAGCTGGAAATGTGGTGCGT-3'      | 445442                     |
|                                | reverse                   | 5'-TCAGCTTCACATTGCCTGTC-3'      |                            |
| <i>rCCL2</i>                   | forward                   | 5'-ATGCAGTTAATGCCCCACTC-3'      | 24770                      |
|                                | reverse                   | 5'-TTCCTTATTGGGGTCAGCAC-3'      |                            |
| <i>rIL-10</i>                  | forward                   | 5'- CCTGCTCTTACTGGCTGGAG -3'    | 25325                      |
|                                | reverse                   | 5'-TGTCCAGCTGGTCCTTCTTT -3'     |                            |
| <i>rIL-6</i>                   | forward                   | 5'-AGAGACTTCCAGCCAGTTGC-3'      | 24498                      |
|                                | reverse                   | 5'-AGTCTCCTCTCCGGACTTGT-3'      |                            |
| <i>rIL-1<math>\beta</math></i> | forward                   | 5'-CCTGTTCTTTGAGGCTGACA-3'      | 24494                      |
|                                | reverse                   | 5'-GCTGTGAGATTTGAAGCTGGA-3'     |                            |
| <i>rINF<math>\gamma</math></i> | forward                   | 5'-ACAACCCACAGATCCAGCAC-3'      | 25712                      |
|                                | reverse                   | 5'-CCAGAATCAGCACCGACTCC-3'      |                            |
| <i>rTNFAIP6</i>                | forward                   | 5'-AAGCAGCCAGAAAGATTGGA -3'     | 84397                      |
|                                | reverse                   | 5'-TTCGGGTTGTAGCAATAGGC -3'     |                            |
| <i>mGAPDH</i>                  | forward                   | 5'-CATCACTGCCACCCAGAAGACTG-3'   | 21825                      |
|                                | reverse                   | 5'-ATGCCAGTGAGCTTCCCGTTCAG-3'   |                            |
| <i>mTHBS1</i>                  | forward                   | 5'-GGTAGCTGGAAATGTGGTGCGT-3'    | 14433                      |
|                                | reverse                   | 5'-GCACCGATGTTCTCCGTTGTGA-3'    |                            |
| <i>mCcl2</i>                   | forward                   | 5'-GCTACAAGAGGATCACCAGCAG-3'    | 20296                      |
|                                | reverse                   | 5'-GTCTGGACCCATTCCTTCTTGG-3'    |                            |

| <b>Gene</b>                    | <b>Primer orientation</b> | <b>Nucleotide sequence</b>     | <b>NCBI Gene ID number</b> |
|--------------------------------|---------------------------|--------------------------------|----------------------------|
| <i>mIL-6</i>                   | forward                   | 5'-CTGCAAGAGACTTCCATCCAG-3'    | 16193                      |
|                                | reverse                   | 5'-AGTGGTATAGACAGGTCTGTTGG-3'  |                            |
| <i>mIL-1<math>\beta</math></i> | forward                   | 5'-TGGACCTTCCAGGATGAGGACA-3'   | 16176                      |
|                                | reverse                   | 5'-GTTTCATCTCGGAGCCTGTAGTG-3'  |                            |
| <i>mINF<math>\gamma</math></i> | forward                   | 5'-CAGCAACAGCAAGGCGAAAAAGG-3'  | 15978                      |
|                                | reverse                   | 5'-TTTCCGCTTCCTGAGGCTGGAT-3'   |                            |
| <i>mTNFAIP6</i>                | forward                   | 5'-GGATGCCTATTGCTACAACCCAC-3'  | 21930                      |
|                                | reverse                   | 5'-CTTGAGCCGAATGTGCCAGTAG-3'   |                            |
| <i>mTNF<math>\alpha</math></i> | forward                   | 5'-GGTGCCTATGTCTCAGCCTCTT-3'   | 21926                      |
|                                | reverse                   | 5'-GCCATAGAACTGATGAGAGGGAG-3'  |                            |
| <i>mIL-10</i>                  | forward                   | 5'-CGGGAAGACAATAACTGCACCC-3'   | 16153                      |
|                                | reverse                   | 5'-CGGTTAGCAGTATGTTGTCCAGC-3'  |                            |
| <i>mIL-1Rn</i>                 | forward                   | 5'-TGTGCCTGTCTTGTGCCAAGTC-3'   | 16181                      |
|                                | reverse                   | 5'-GCCTTTCTCAGAGCGGATGAAG-3'   |                            |
| <i>mIL-4</i>                   | forward                   | 5'-ATCATCGGCATTTTGAACGAGGTC-3' | 16189                      |
|                                | reverse                   | 5'-ACCTTGGAAGCCCTACAGACGA-3'   |                            |
| <i>mIL-11</i>                  | forward                   | 5'-CTGACGGAGATCACAGTCTGGA-3'   | 16156                      |
|                                | reverse                   | 5'-GGACATCAAGTCTACTCGAAGCC-3'  |                            |
| <i>mIL-13</i>                  | forward                   | 5'-AACGGCAGCATGGTATGGAGTG-3'   | 6163                       |
|                                | reverse                   | 5'-TGGGTCCTGTAGATGGCATTGC-3'   |                            |

NOTE. *h*, human; *m*, mouse; *r*, rat.

**Table S4. Antibodies for Western immunoblotting and immunohistochemistry**

| <b>Primary antibodies</b>   |                       |                                          |
|-----------------------------|-----------------------|------------------------------------------|
| <b>Antibody</b>             | <b>Catalog number</b> | <b>Company</b>                           |
| <i>THBS1</i>                | ab1823                | Abcam, Cambridge, UK                     |
| <i>ALB</i>                  | HPA031025             | Sigma–Aldrich, MO, USA                   |
| <i>CD86</i>                 | ab53004               | Abcam, Cambridge, UK                     |
| <i>BAX</i>                  | 14796                 | Cell Signaling Technology (CST), MA, USA |
| <i>Bcl2</i>                 | sc-7382               | Santa Cruz, CA, USA                      |
| <i>Cleaved caspase 3</i>    | 9661                  | Cell Signaling Technology (CST) MA, USA  |
| <i>β-actin</i>              | Ab8226                | Abcam, Cambridge, UK                     |
| <b>Secondary antibodies</b> |                       |                                          |
| <b>Antibody</b>             | <b>Catalog number</b> | <b>Company</b>                           |
| <i>Goat anti-mouse</i>      | ab6789                | Abcam, Cambridge, UK                     |
| <i>Goat anti-rabbit</i>     | ab6721                | Abcam, Cambridge, UK                     |

**Table S5. Clinical characteristics of ACLF patients with different THBS1 expression in the validation group**

| Characteristics                            | Group 0                      | Group 1                      |
|--------------------------------------------|------------------------------|------------------------------|
|                                            | THBS1<median (3.5)<br>n = 49 | THBS1>median (3.5)<br>n = 49 |
| <b>Age (yrs.)</b>                          | 45.5±10.6                    | 47.7±13.6                    |
| <b>Male (No.)</b>                          | 85.7% (42)                   | 92.8% (45)                   |
| <b>HBV-DNA level (IU/ml)</b>               |                              |                              |
| $2 \times 10^2 - 2 \times 10^4$            | 30.6% (15)                   | 22.5% (11)                   |
| $2 \times 10^4 - 2 \times 10^6$            | 40.8% (20)                   | 36.7% (18)                   |
| $> 2 \times 10^6$                          | 28.6% (14)                   | 40.8% (20)                   |
| <b>Laboratory data</b>                     |                              |                              |
| Alanine aminotransferase (U/L)             | 225.0 [87.0, 546.0]          | 368.0 [178.0, 773.0]         |
| Aspartate aminotransferase (U/L)           | 148.0 [84.0, 290.0]          | 187.0 [117.0, 368.0]         |
| Albumin (g/dL)                             | 32.0 [28.0, 35.0]            | 31.5 [28.5, 33.2]            |
| Total bilirubin ( $\mu\text{mol/l}$ )      | 342.0 [245.0, 432.0]         | 344.0 [261.0, 405.3]         |
| Alkaline phosphatase (U/L)                 | 133.0 [100.0, 162.0]         | 137.0 [112.0, 162.0]         |
| $\gamma$ -Glutamyl transpeptidase (U/L)    | 67.0 [38.0, 108.0]           | 76.0 [47.0, 117.0]**         |
| Creatinine ( $\mu\text{mol/L}$ )           | 63.0 [55.0, 72.0]            | 69.0 [59.0, 91.0]**          |
| Sodium (mmol/L)                            | 137.0 [135.0, 139.0]         | 137.0 [135.0, 141.0]         |
| White blood cell count ( $10^9/\text{L}$ ) | 7.6 [6.1, 9.7]               | 7.50 [6.2, 10.4]             |
| Hemoglobin (g/L)                           | 126.0 [117.0, 136.0]         | 125.0 [117.0, 140.0]         |
| Hematocrit (%)                             | 36.6 [33.2, 38.7]            | 35.6 [33.0, 39.70]           |
| Platelet count ( $10^9/\text{L}$ )         | 106.0 [80.0, 172.0]          | 116.0 [72.0, 133.0]          |
| INR                                        | 2.1 [1.7, 2.7]               | 2.4 [1.8, 2.9]               |
| Alpha fetoprotein                          | 92.4 [33.1, 231.5]           | 86.4 [30.6 235.3]            |
| <b>Organ failure (No.)</b>                 |                              |                              |
| Liver                                      | 91.8% (45)                   | 93.9% (46)                   |

| Characteristics                                            | Group 0            | Group 1            |
|------------------------------------------------------------|--------------------|--------------------|
|                                                            | THBS1<median (3.5) | THBS1>median (3.5) |
|                                                            | n = 49             | n = 49             |
| Coagulation                                                | 30.6% (15)         | 49.0% (24)         |
| Kidneys                                                    | 0.0% (0)           | 4.1% (2)           |
| Brain                                                      | 4.1% (2)           | 8.2% (4)           |
| Lungs                                                      | 0.0% (0)           | 2.0% (1)           |
| Circulation                                                | 0.0% (0)           | 2.0% (1)           |
| <b>ACLF grade</b>                                          |                    |                    |
| ACLF-1                                                     | 73.5% (36)         | 51.0% (25)         |
| ACLF-2                                                     | 22.4% (11)         | 40.8% (20)         |
| ACLF-3                                                     | 4.1% (2)           | 8.2% (4)           |
| <b>Severity score</b>                                      |                    |                    |
| COSSH-ACLF IIs                                             | 7.1 [6.6, 7.5]     | 7.3 [6.7, 8.1]*    |
| COSSH-ACLFs                                                | 6.0 [5.6, 6.7]     | 6.3 [5.8, 6.9]     |
| CLIF-C ACLFs                                               | 40.5 [37.3, 45.1]  | 41.7 [38.7, 47.2]  |
| MELD-Na                                                    | 25.4 [20.7, 26.9]  | 25.9 [22.6, 31.7]  |
| MELD                                                       | 22.5 [20.2, 26.1]  | 25.5 [21.6, 30.8]* |
| CTP                                                        | 9.0 [8.0, 10.0]    | 10.0 [9.0, 11.0]*  |
| <b>Transplant-free mortality (No. deceased patients) †</b> |                    |                    |
| 28-day                                                     | 17.5% (7)          | 45.0% (18)*        |
| 90-day                                                     | 27.7% (10)         | 58.3% (21)*        |

NOTE. Data are expressed as the mean ± standard deviation (SD), median (p25, p75) or percentage (number of patients).

COSSH-ACLF IIs, COSSH-ACLF II score; COSSH-ACLFs, COSSH-ACLF score; CLIF-C ACLFs, CLIF Consortium ACLF score; MELDs, Model for End-stage Liver Disease score; MELD-Na, MELD-sodium score; CTP, Child-Turcotte-Pugh score; THBS1, thrombospondin 1.

†Twelve patients with ACLF underwent liver transplantation and were considered lost to follow-up in the mortality rate calculation. Six patients with ACLF were lost to the 28-day follow-up analysis, and 14 patients were lost to the 90-day follow-up analysis.

\* $P < 0.05$  and \*\* $P < 0.01$  for comparisons between the groups.

**Table S6. Clinical characteristics of ACLF patients in the low-risk group and high-risk group of the ELISA validation cohort**

| Characteristics                            | Low-risk group<br>n = 75 | High-risk group<br>n = 123 |
|--------------------------------------------|--------------------------|----------------------------|
| <b>Age (yrs.)</b>                          | 50.3±12.0                | 48.2±12.2                  |
| <b>Male (No.)</b>                          | 78.7% (59)               | 82.9% (102)                |
| <b>HBV-DNA level (IU/ml)</b>               |                          |                            |
| $2 \times 10^2 - 2 \times 10^4$            | 37.3% (28)               | 36.6% (45)                 |
| $2 \times 10^4 - 2 \times 10^6$            | 44.0% (33)               | 34.1% (42)                 |
| $> 2 \times 10^6$                          | 18.7% (14)               | 29.3% (36)                 |
| <b>Laboratory data</b>                     |                          |                            |
| Alanine aminotransferase (U/L)             | 152.0 [55.0, 318.0]      | 250.0 [100.0, 476.0]*      |
| Aspartate aminotransferase (U/L)           | 114.0 [67.0, 211.0]      | 130.0 [80.0, 294.0]        |
| Albumin (g/dL)                             | 30.6 [27.9, 33.8]        | 30.5 [28.3, 33.2]          |
| Total bilirubin ( $\mu\text{mol/l}$ )      | 310.0 [252.1, 416.5]     | 366.1 [282.0, 428.9]       |
| Alkaline phosphatase (U/L)                 | 129.0 [109.0, 173.0]     | 143.0 [122.0, 174.0]       |
| $\gamma$ -Glutamyl transpeptidase (U/L)    | 68.0 [39.0, 109.0]       | 79.0 [54.0, 122.0]*        |
| Creatinine ( $\mu\text{mol/L}$ )           | 65.0 [58.0, 80.0]        | 60.0 [52.0, 75.0]          |
| Sodium (mmol/L)                            | 138.0 [135.0, 140.0]     | 138.0 [136.0, 140.0]       |
| White blood cell count ( $10^9/\text{L}$ ) | 6.50 [4.5, 9.1]          | 7.7 [6.1, 9.6]             |
| Hemoglobin (g/L)                           | 112.0 [103.0, 133.0]     | 125.0 [110.0, 139.0]*      |
| Hematocrit (%)                             | 31.5 [29.6, 38.1]        | 34.6 [30.8, 39.1]          |
| Platelet count ( $10^9/\text{L}$ )         | 76 [55.0, 117.0]         | 113.0 [78.0, 141.0]***     |
| INR                                        | 2.24 [1.79, 2.67]        | 2.10 [1.80, 2.64]          |
| Alpha fetoprotein                          | 104.1 [29.1, 309.8]      | 90.5 [33.7, 257.2]         |
| <b>Organ failure (No.)</b>                 |                          |                            |
| Liver                                      | 96.0% (72)               | 100.0% (123)               |

| Characteristics                                          | Low-risk group<br>n = 75 | High-risk group<br>n = 123 |
|----------------------------------------------------------|--------------------------|----------------------------|
| Coagulation                                              | 40.0% (30)               | 32.5% (40)                 |
| Kidneys                                                  | 6.7% (5)                 | 1.6% (2)                   |
| Brain                                                    | 9.3% (7)                 | 8.9% (11)                  |
| Lungs                                                    | 1.3% (1)                 | 0.8% (1)                   |
| Circulation                                              | 5.3% (4)                 | 1.6% (2)                   |
| <b>ACLF grade</b>                                        |                          |                            |
| ACLF-1                                                   | 60.0% (45)               | 61.0% (75)                 |
| ACLF-2                                                   | 32.0% (24)               | 30.1% (37)                 |
| ACLF-3                                                   | 8.0% (6)                 | 8.9% (11)                  |
| <b>Severity score</b>                                    |                          |                            |
| COSSH-ACLF IIs                                           | 7.3 [6.8, 8.1]           | 7.1 [6.5, 8.0]*            |
| COSSH-ACLFs                                              | 6.4 [5.7, 6.9]           | 6.2 [5.7, 6.8]             |
| CLIF-C ACLFs                                             | 43.3 [38.0, 49.1]        | 42.5 [36.6, 48.2]          |
| MELD-Na                                                  | 28.5 [25.2, 30.8]        | 27.0 [25.4, 29.9]          |
| MELD                                                     | 27.0 [24.1, 30.0]        | 26.1 [24.3, 28.9]          |
| CTP                                                      | 11.0 [10.0, 12.0]        | 11.0 [10.0, 12.0]          |
| <b>Transplant-free mortality (No. deceased patients)</b> |                          |                            |
| 28-day                                                   | 10.7% (8)                | 46.3% (57)**               |
| 90-day                                                   | 18.7% (14)               | 58.5% (72)**               |

NOTE. Data are expressed as the mean  $\pm$  standard deviation (SD), median (p25, p75) or percentage (number of patients).

COSSH-ACLF IIs, COSSH-ACLF II score; COSSH-ACLFs, COSSH-ACLF score; CLIF-C ACLFs, CLIF Consortium ACLF score; MELDs, Model for End-stage Liver Disease score; MELD-Na, MELD-sodium score; CTP, Child-Turcotte-Pugh score; THBS1, thrombospondin 1. \* $P < 0.05$ , \*\* $P < 0.01$  and \*\*\* $P < 0.001$  for comparisons between the groups.







|            |                                                                                           |      |                                                                        |
|------------|-------------------------------------------------------------------------------------------|------|------------------------------------------------------------------------|
| GO:0071675 | regulation of mononuclear cell migration                                                  | 0.02 | [SERPINE1, THBS1, TNF]                                                 |
| GO:0072577 | endothelial cell apoptotic process                                                        | 0.00 | [CC12, IL10, SERPINE1, THBS1, TNF]                                     |
| GO:1504707 | positive regulation of vascular smooth muscle cell proliferation                          | 0.01 | [IL10, MMP9, TNF]                                                      |
| GO:1504894 | positive regulation of receptor signaling pathway via STAT                                | 0.00 | [IL10, IL6, LIF, TNF, TNFSF18]                                         |
| GO:1590889 | cellular response to chemokine                                                            | 0.00 | [CC12, CCL22, CCL7, CCL8, CCR7]                                        |
| GO:2000401 | regulation of lymphocyte migration                                                        | 0.03 | [CXCL12, CCL12]                                                        |
| GO:0002690 | positive regulation of leukocyte chemotaxis                                               | 0.00 | [CCL7, CCR7, IL6, SERPINE1, THBS1]                                     |
| GO:0022712 | regulation of B cell mediated immunity                                                    | 0.00 | [CXCL12, CXCL13, IL10, TNF]                                            |
| GO:0022792 | negative regulation of peptide secretion                                                  | 0.00 | [ADRA2A, CACPP1, CCR7, FCGR2B, IL10, INHBB, PTGER4, TNF]               |
| GO:0005509 | membrane protein ectodomain proteolysis                                                   | 0.01 | [ADRA2A, IL10, TNF]                                                    |
| GO:0008059 | chemokine activity                                                                        | 0.00 | [CXCL12, CCL2, CCL22, CCL7, CCL8]                                      |
| GO:0011638 | zymogen activation                                                                        | 0.02 | [CXCL12, SERPINE1, THBS1]                                              |
| GO:0046425 | regulation of receptor signaling pathway via JAK-STAT                                     | 0.00 | [CDK5R1, IL10, IL6, LIF, TNF, TNFSF18]                                 |
| GO:0051043 | regulation of membrane protein ectodomain proteolysis                                     | 0.00 | [ADRA2A, IL10, TNF]                                                    |
| GO:1504994 | regulation of epithelial cell apoptotic process                                           | 0.00 | [IL6, SERPINE1, THBS1, TNF]                                            |
| GO:1504994 | regulation of leukocyte adhesion to vascular endothelial cell                             | 0.00 | [IL6, SELL, TNF]                                                       |
| GO:0072677 | eosinophil migration                                                                      | 0.00 | [CCL2, CCL7, CCL8, PTGER4]                                             |
| GO:0030593 | neutrophil chemotaxis                                                                     | 0.01 | [CCL2, CCL22, CCL7, CCL8, CCR7]                                        |
| GO:0046427 | positive regulation of receptor signaling pathway via JAK-STAT                            | 0.00 | [IL10, IL6, LIF, TNF, TNFSF18]                                         |
| GO:0046245 | eosinophil chemotaxis                                                                     | 0.00 | [CCL2, CCL7, CCL8]                                                     |
| GO:0050709 | negative regulation of protein secretion                                                  | 0.00 | [ADRA2A, CCR7, FCGR2B, IL10, INHBB, PTGER4, TNF]                       |
| GO:0050710 | negative regulation of cytokine secretion                                                 | 0.00 | [CCR7, FCGR2B, IL10, PTGER4, TNF]                                      |
| GO:1504037 | positive regulation of epithelial cell apoptotic process                                  | 0.00 | [CCL2, IL6, THBS1]                                                     |
| GO:1504996 | positive regulation of leukocyte adhesion to vascular endothelial cell                    | 0.00 | [IL6, SELL, TNF]                                                       |
| GO:0002889 | regulation of immunoglobulin mediated immune response                                     | 0.00 | [CXCL12, CXCL13, IL10, TNF]                                            |
| GO:1502041 | regulation of extrinsic apoptotic signaling pathway via death domain receptors            | 0.03 | [IL6, SERPINE1, THBS1]                                                 |
| GO:2000311 | regulation of endothelial cell apoptotic process                                          | 0.00 | [CCL2, SERPINE1, THBS1, TNF]                                           |
| GO:0043114 | negative regulation of cysteine-type endopeptidase activity involved in apoptotic process | 0.00 | [IL6, PTGS2, TNF, THBS1, TNF]                                          |
| GO:0070314 | positive regulation of ERK1 and ERK2 cascade                                              | 0.00 | [BMPK1, CCL2, CCL22, CCL7, CCL8, CCR7, FGF3, GPCR2, GPCR4, GPCR5, TNF] |
| GO:1503672 | positive regulation of sprouting angiogenesis                                             | 0.01 | [BMPK1, IL10, PTGS2]                                                   |
| GO:2000117 | negative regulation of cysteine-type endopeptidase activity                               | 0.00 | [IL6, PTGS2, TNF, THBS1, TNF]                                          |

**Table S8. The immune-related biological processes for top 200 DEGs which were both differentially expressed in the comparisons of ACLF vs. LC and ACLF vs. NC**

| GO ID      | GO Term                                                                       | Term | PValue | Associated Genes Found                                                               |
|------------|-------------------------------------------------------------------------------|------|--------|--------------------------------------------------------------------------------------|
| GO:0070664 | negative regulation of leukocyte proliferation                                |      | 0.0142 | [CCL8, FCGR2B, GPNMB, IL10]                                                          |
| GO:0002251 | organ or tissue specific immune response                                      |      | 0.0091 | [C17orf99, GCNT3, IL6]                                                               |
| GO:0002381 | immunoglobulin production involved in immunoglobulin mediated immune response |      | 0.0308 | [C17orf99, GCNT3, IL10]                                                              |
| GO:0070741 | response to interleukin-6                                                     |      | 0.0097 | [C1QTNF4, FGF23, IL6]                                                                |
| GO:0071354 | cellular response to interleukin-6                                            |      | 0.0074 | [C1QTNF4, FGF23, IL6]                                                                |
| GO:0002286 | T cell activation involved in immune response                                 |      | 0.0048 | [CLEC4D, FCGR2B, IL6, PTGER4, TNFSF18]                                               |
| GO:0002292 | T cell differentiation involved in immune response                            |      | 0.0332 | [CLEC4D, IL6, PTGER4]                                                                |
| GO:0002701 | negative regulation of production of molecular mediator of immune response    |      | 0.0069 | [FCGR2B, IL10, TNF]                                                                  |
| GO:0002761 | regulation of myeloid leukocyte differentiation                               |      | 0.0085 | [CARTPT, FSTL3, LIF, SLC9B2, TNF]                                                    |
| GO:0002763 | positive regulation of myeloid leukocyte differentiation                      |      | 0.0213 | [LIF, SLC9B2, TNF]                                                                   |
| GO:0061756 | leukocyte adhesion to vascular endothelial cell                               |      | 0.0011 | [IL6, SELE, SELL, TNF]                                                               |
| GO:0050901 | leukocyte tethering or rolling                                                |      | 0.004  | [SELE, SELL, TNF]                                                                    |
| GO:1904994 | regulation of leukocyte adhesion to vascular endothelial cell                 |      | 0.003  | [IL6, SELE, TNF]                                                                     |
| GO:1904996 | positive regulation of leukocyte adhesion to vascular endothelial cell        |      | 0.0013 | [IL6, SELE, TNF]                                                                     |
| GO:1905517 | macrophage migration                                                          |      | 0.0274 | [CCL2, EDNRB, THBS1]                                                                 |
| GO:0048246 | macrophage chemotaxis                                                         |      | 0.0145 | [CCL2, EDNRB, THBS1]                                                                 |
| GO:0002468 | dendritic cell antigen processing and presentation                            |      | 0.0002 | [CCR7, FCGR2B, THBS1]                                                                |
| GO:0002577 | regulation of antigen processing and presentation                             |      | 0.0015 | [CCR7, FCGR2B, THBS1]                                                                |
| GO:0002604 | regulation of dendritic cell antigen processing and presentation              |      | 0.0002 | [CCR7, FCGR2B, THBS1]                                                                |
| GO:0032615 | interleukin-12 production                                                     |      | 0.0264 | [CCR7, IL10, THBS1]                                                                  |
| GO:0002544 | chronic inflammatory response                                                 |      | 0.0009 | [IL10, THBS1, TNF]                                                                   |
| GO:0032655 | regulation of interleukin-12 production                                       |      | 0.0243 | [CCR7, IL10, THBS1]                                                                  |
| GO:0032695 | negative regulation of interleukin-12 production                              |      | 0.0009 | [CCR7, IL10, THBS1]                                                                  |
| GO:0002688 | regulation of leukocyte chemotaxis                                            |      | 0.0025 | [CCL2, CCL7, CCR7, IL6, SERPINE1, THBS1]                                             |
| GO:0150076 | neuroinflammatory response                                                    |      | 0.0062 | [IL6, MMP3, PTGS2, TNF]                                                              |
| GO:0150077 | regulation of neuroinflammatory response                                      |      | 0.0004 | [IL6, MMP3, PTGS2, TNF]                                                              |
| GO:0002675 | positive regulation of acute inflammatory response                            |      | 0.0003 | [CCR7, IL6, PTGS2, TNF]                                                              |
| GO:0031649 | heat generation                                                               |      | 0.0009 | [EDNRB, PTGS2, TNF]                                                                  |
| GO:0001660 | fever generation                                                              |      | 0.0002 | [EDNRB, PTGS2, TNF]                                                                  |
| GO:0002673 | regulation of acute inflammatory response                                     |      | 1E-05  | [CCR7, EDNRB, FCGR2B, IL6, PTGS2, TNF]                                               |
| GO:0006953 | acute-phase response                                                          |      | 0.0035 | [EDNRB, IL6, PTGS2, TNF]                                                             |
| GO:0031620 | regulation of fever generation                                                |      | 0.0001 | [EDNRB, PTGS2, TNF]                                                                  |
| GO:0032715 | negative regulation of interleukin-6 production                               |      | 0.0116 | [IL10, IL6, TNF]                                                                     |
| GO:0002526 | acute inflammatory response                                                   |      | 0.0003 | [CCR7, EDNRB, FCGR2B, IL6, PTGS2, TNF, TREM1]                                        |
| GO:0002718 | regulation of cytokine production involved in immune response                 |      | 0.0181 | [IL10, IL6, NR4A3, TNF]                                                              |
| GO:0002700 | regulation of production of molecular mediator of immune response             |      | 0.0015 | [C17orf99, CGAS, FCGR2B, IL10, IL6, NR4A3, TNF]                                      |
| GO:0042116 | macrophage activation                                                         |      | 0.0038 | [FCGR2B, IL10, IL6, THBS1, TNF]                                                      |
| GO:0002437 | inflammatory response to antigenic stimulus                                   |      | 0.0039 | [CCR7, FCGR2B, IL10, TNF]                                                            |
| GO:0032637 | interleukin-8 production                                                      |      | 0.0123 | [FCN1, IL10, SERPINE1, TNF]                                                          |
| GO:0030595 | leukocyte chemotaxis                                                          |      | 9E-06  | [C10orf99, CCL2, CCL22, CCL7, CCL8, CCR7, CH25H, EDNRB, IL10, IL6, SERPINE1, THBS1]  |
| GO:0071674 | mononuclear cell migration                                                    |      | 9E-06  | [CCL2, CCL22, CCL7, CCL8, IL6, SERPINE1, THBS1, TNF]                                 |
| GO:0072676 | lymphocyte migration                                                          |      | 0.0002 | [C10orf99, CCL2, CCL22, CCL7, CCL8, CCR7, CH25H]                                     |
| GO:0097529 | myeloid leukocyte migration                                                   |      | 0.0002 | [CCL2, CCL22, CCL7, CCL8, CCR7, EDNRB, IL6, PTGER4, SERPINE1, THBS1]                 |
| GO:0002637 | regulation of immunoglobulin production                                       |      | 0.0001 | [C17orf99, CGAS, FCGR2B, IL10, IL6, TNF]                                             |
| GO:0002685 | regulation of leukocyte migration                                             |      | 3E-06  | [C10orf99, CCL2, CCL7, CCL8, CCR7, IL6, PTGER4, SELE, SERPINE1, THBS1, TNF, TNFSF18] |
| GO:0002922 | positive regulation of humoral immune response                                |      | 3E-05  | [ACOD1, CCR7, FCGR2B, TNF]                                                           |
| GO:0043030 | regulation of macrophage activation                                           |      | 0.0035 | [FCGR2B, IL10, IL6, THBS1]                                                           |
| GO:0002687 | positive regulation of leukocyte migration                                    |      | 2E-05  | [CCL7, CCL8, CCR7, IL6, SELE, SERPINE1, THBS1, TNF, TNFSF18]                         |
| GO:0002861 | regulation of inflammatory response to antigenic stimulus                     |      | 0.0002 | [CCR7, FCGR2B, IL10, TNF]                                                            |
| GO:0032677 | regulation of interleukin-8 production                                        |      | 0.0085 | [FCN1, IL10, SERPINE1, TNF]                                                          |
| GO:0002548 | monocyte chemotaxis                                                           |      | 8E-05  | [CCL2, CCL22, CCL7, CCL8, IL6, SERPINE1]                                             |
| GO:0048247 | lymphocyte chemotaxis                                                         |      | 6E-05  | [C10orf99, CCL2, CCL22, CCL7, CCL8, CH25H]                                           |
| GO:0097530 | granulocyte migration                                                         |      | 0.0012 | [CCL2, CCL22, CCL7, CCL8, CCR7, PTGER4, THBS1]                                       |
| GO:0032757 | positive regulation of interleukin-8 production                               |      | 0.0204 | [FCN1, SERPINE1, TNF]                                                                |
| GO:0071621 | granulocyte chemotaxis                                                        |      | 0.0028 | [CCL2, CCL22, CCL7, CCL8, CCR7, THBS1]                                               |
| GO:0071675 | regulation of mononuclear cell migration                                      |      | 0.0195 | [SERPINE1, THBS1, TNF]                                                               |
| GO:2000401 | regulation of lymphocyte migration                                            |      | 0.0264 | [C10orf99, CCL2, CCL7]                                                               |
| GO:0002690 | positive regulation of leukocyte chemotaxis                                   |      | 0.0035 | [CCL7, CCR7, IL6, SERPINE1, THBS1]                                                   |
| GO:0002712 | regulation of B cell mediated immunity                                        |      | 0.0031 | [C17orf99, FCGR2B, IL10, TNF]                                                        |
| GO:0072677 | eosinophil migration                                                          |      | 0.0002 | [CCL2, CCL7, CCL8, PTGER4]                                                           |
| GO:0030593 | neutrophil chemotaxis                                                         |      | 0.0052 | [CCL2, CCL22, CCL7, CCL8, CCR7]                                                      |
| GO:0048245 | eosinophil chemotaxis                                                         |      | 0.0019 | [CCL2, CCL7, CCL8]                                                                   |
| GO:0002889 | regulation of immunoglobulin mediated immune response                         |      | 0.0031 | [C17orf99, FCGR2B, IL10, TNF]                                                        |

**Table S9. The apoptosis-related biological processes for top 200 DEGs which were both differentially expressed in the comparisons of ACLF vs. LC and ACLF vs. NC**

| GO ID      | GO Term                                                                                   | Term | PValue | Associated Genes Found                  |
|------------|-------------------------------------------------------------------------------------------|------|--------|-----------------------------------------|
| GO:0043277 | apoptotic cell clearance                                                                  |      | 0.0137 | [CCL2, FCN1, THBS1]                     |
| GO:1904037 | positive regulation of epithelial cell apoptotic process                                  |      | 0.0047 | [CCL2, IL6, THBS1]                      |
| GO:0072577 | endothelial cell apoptotic process                                                        |      | 0.0003 | [CCL2, IL10, SERPINE1, THBS1, TNF]      |
| GO:1904035 | regulation of epithelial cell apoptotic process                                           |      | 0.0019 | [CCL2, IL6, SERPINE1, THBS1, TNF]       |
| GO:2000351 | regulation of endothelial cell apoptotic process                                          |      | 0.0017 | [CCL2, SERPINE1, THBS1, TNF]            |
| GO:0043277 | apoptotic cell clearance                                                                  |      | 0.0137 | [CCL2, FCN1, THBS1]                     |
| GO:1904019 | epithelial cell apoptotic process                                                         |      | 0.0009 | [CCL2, IL10, IL6, SERPINE1, THBS1, TNF] |
| GO:1904035 | regulation of epithelial cell apoptotic process                                           |      | 0.0019 | [CCL2, IL6, SERPINE1, THBS1, TNF]       |
| GO:1904037 | positive regulation of epithelial cell apoptotic process                                  |      | 0.0047 | [CCL2, IL6, THBS1]                      |
| GO:1902041 | regulation of extrinsic apoptotic signaling pathway via death domain receptors            |      | 0.0332 | [IL6, SERPINE1, THBS1]                  |
| GO:0008625 | extrinsic apoptotic signaling pathway via death domain receptors                          |      | 0.017  | [IL6, SERPINE1, THBS1, TNF]             |
| GO:0043154 | negative regulation of cysteine-type endopeptidase activity involved in apoptotic process |      | 0.0029 | [IL6, PTGS2, SFN, THBS1, TNF]           |
| GO:0043154 | negative regulation of cysteine-type endopeptidase activity involved in apoptotic process |      | 0.0029 | [IL6, PTGS2, SFN, THBS1, TNF]           |
| GO:0071887 | leukocyte apoptotic process                                                               |      | 0.0065 | [CCR7, IL10, IL6, NR4A3, PTCRA]         |
| GO:1903202 | negative regulation of oxidative stress-induced cell death                                |      | 0.0027 | [IL10, IL6, NR4A3, PYCR1]               |
| GO:0036474 | cell death in response to hydrogen peroxide                                               |      | 0.0004 | [IL10, IL6, NR4A3, PYCR1]               |
| GO:1903205 | regulation of hydrogen peroxide-induced cell death                                        |      | 0.0002 | [IL10, IL6, NR4A3, PYCR1]               |
| GO:2000106 | regulation of leukocyte apoptotic process                                                 |      | 0.0137 | [CCR7, IL10, NR4A3, PTCRA]              |
| GO:1903206 | negative regulation of hydrogen peroxide-induced cell death                               |      | 0.0001 | [IL10, IL6, NR4A3, PYCR1]               |
| GO:0036473 | cell death in response to oxidative stress                                                |      | 0.0033 | [IL10, IL6, MMP3, NR4A3, PYCR1]         |
| GO:0071887 | leukocyte apoptotic process                                                               |      | 0.0065 | [CCR7, IL10, IL6, NR4A3, PTCRA]         |
| GO:1903201 | regulation of oxidative stress-induced cell death                                         |      | 0.0012 | [IL10, IL6, MMP3, NR4A3, PYCR1]         |
| GO:1903202 | negative regulation of oxidative stress-induced cell death                                |      | 0.0027 | [IL10, IL6, NR4A3, PYCR1]               |
| GO:0036474 | cell death in response to hydrogen peroxide                                               |      | 0.0004 | [IL10, IL6, NR4A3, PYCR1]               |
| GO:1903205 | regulation of hydrogen peroxide-induced cell death                                        |      | 0.0002 | [IL10, IL6, NR4A3, PYCR1]               |
| GO:1903206 | negative regulation of hydrogen peroxide-induced cell death                               |      | 0.0001 | [IL10, IL6, NR4A3, PYCR1]               |
| GO:1904019 | epithelial cell apoptotic process                                                         |      | 0.0009 | [CCL2, IL10, IL6, SERPINE1, THBS1, TNF] |
| GO:0008625 | extrinsic apoptotic signaling pathway via death domain receptors                          |      | 0.017  | [IL6, SERPINE1, THBS1, TNF]             |
| GO:0072577 | endothelial cell apoptotic process                                                        |      | 0.0003 | [CCL2, IL10, SERPINE1, THBS1, TNF]      |
| GO:1904035 | regulation of epithelial cell apoptotic process                                           |      | 0.0019 | [CCL2, IL6, SERPINE1, THBS1, TNF]       |
| GO:1904037 | positive regulation of epithelial cell apoptotic process                                  |      | 0.0047 | [CCL2, IL6, THBS1]                      |
| GO:1902041 | regulation of extrinsic apoptotic signaling pathway via death domain receptors            |      | 0.0332 | [IL6, SERPINE1, THBS1]                  |
| GO:2000351 | regulation of endothelial cell apoptotic process                                          |      | 0.0017 | [CCL2, SERPINE1, THBS1, TNF]            |
| GO:0043154 | negative regulation of cysteine-type endopeptidase activity involved in apoptotic process |      | 0.0029 | [IL6, PTGS2, SFN, THBS1, TNF]           |
