# Supplementary material for: Thrombospondin 1 enhances systemic inflammation and disease severity in acute-on-chronic liver failure
Source: Springer Nature journal article supplement (doi:10.1186/s12916-024-03318-x), 2024-03-05
Supplement: MOESM4 [file 26820178]

## **SUPPLEMENTARY FILE 4**

### **Thrombospondin 1 enhances systemic inflammation and disease severity in acute-on-chronic liver failure**

Hozeifa Mohamed Hassan<sup>†</sup>, Xi Liang<sup>†</sup>, Jiaojiao Xin<sup>†</sup>, Yingyan Lu, Qun Cai, Dongyan Shi, Keke Ren, Jun Li, Qi Chen, Jiang Li, Peng Li, Beibei Guo, Hui Yang, Jinjin Luo, Heng Yao, Xingping Zhou, Wen Hu, Jing Jiang<sup>\*</sup>, Jun Li<sup>\*</sup>

#### **Contents**

- **Figure S1**

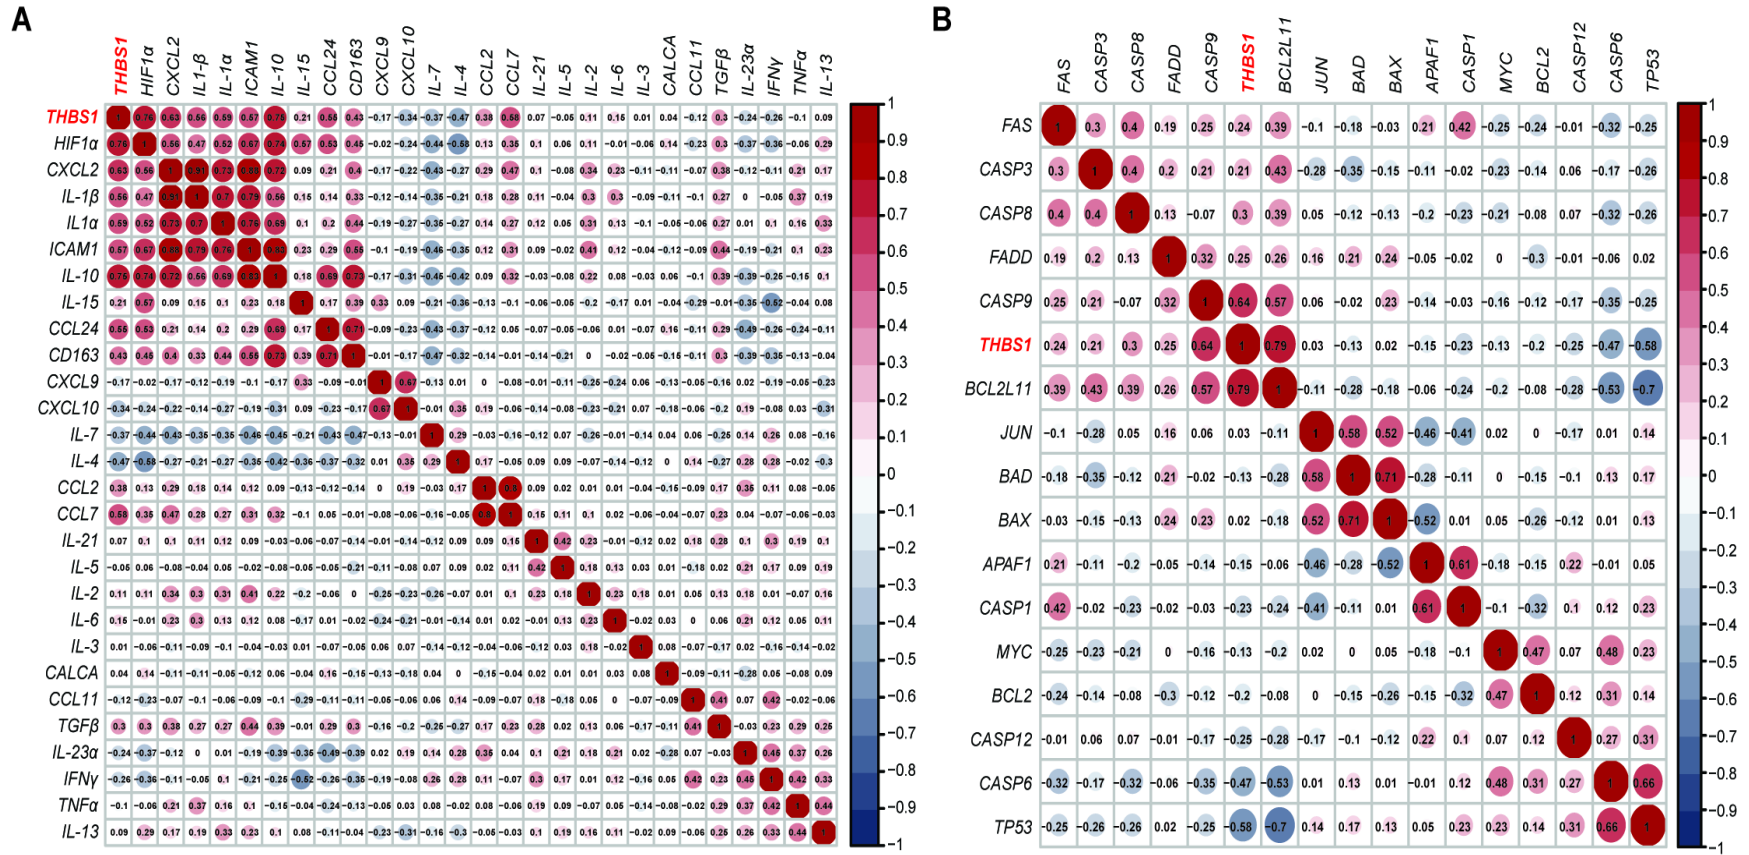

**Fig.S1 Correlations between THBS1 with inflammatory and apoptotic markers.** THBS1 was positively correlated with other top-key genes related to (A) Immune micro-environment and (B) Apoptotic markers in the human PBMCs transcriptome.
